# Supplementary figures and images for: Novel Roles for Selected Genes in Meiotic DNA Processing
Source: PLOS journal article supplement (doi:10.1371/journal.pgen.0030222), 2007-11-30

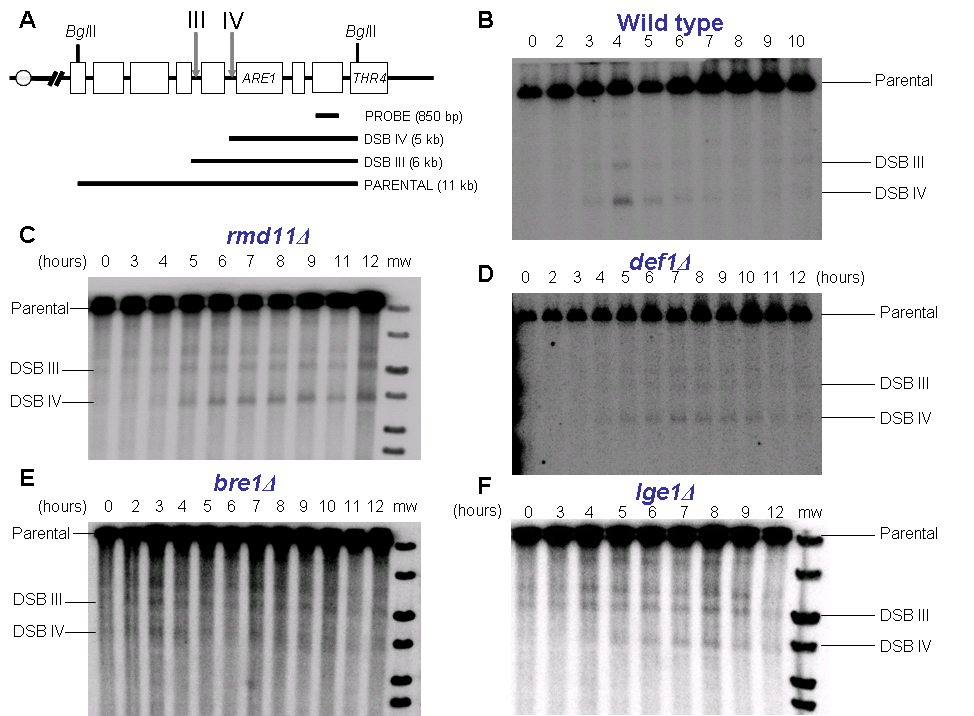

Supplement: S4 (10.1371/journal.pgen.0030222.s004) [file journal.pgen.0030222.s004]
